# Supplementary material for: Highly Accurate and Precise Automated Cup-to-Disc Ratio Quantification for Glaucoma Screening
Source: PubMed Central journal article supplement — Ophthalmol Sci. 2024 Apr 27;4(5):100540. doi: 10.1016/j.xops.2024.100540 (PMC11268341; doi:10.1016/j.xops.2024.100540), 2024-04-27
Supplement: mmc1.pdf [file mmc1.pdf]

## Supplementary Tables:

# Highly accurate and precise automated cup-to-disc ratio quantification for glaucoma screening

Abadh K Chaurasia,<sup>1\*</sup> Connor J Greatbatch,<sup>1</sup> Xikun Han,<sup>2,3</sup> Puya Gharahkhani,<sup>2,3,4</sup> David A Mackey,<sup>5</sup> Stuart MacGregor,<sup>2,3</sup> Jamie E Craig,<sup>6</sup> Alex W Hewitt,<sup>1,7</sup>

### Affiliations:

1. Menzies Institute for Medical Research, University of Tasmania, Australia.
2. QIMR Berghofer Medical Research Institute, Brisbane, Australia.
3. School of Medicine, University of Queensland, Brisbane, Australia.
4. Faculty of Health, School of Biomedical Sciences, Queensland University of Technology, Brisbane, Queensland, Australia.
5. Lions Eye Institute, Centre for Vision Sciences, University of Western Australia, Australia.
6. Department of Ophthalmology, Flinders University, Flinders Medical Centre, Bedford Park, Australia.
7. Centre for Eye Research Australia, University of Melbourne, Australia.

### \*Correspondence:

Abadh K Chaurasia

Menzies Institute for Medical Research,

University of Tasmania, Australia.

Email: awadhaiims@gmail.com

**Table S1:** Summary of the data block and batch transform parameters for classification and regression tasks.

**i). Data Block:**

| Parameter | Classification Task            | Regression Task                        |
|-----------|--------------------------------|----------------------------------------|
| blocks    | (ImageBlock, CategoryBlock)    | (ImageBlock, RegressionBlock(n_out=1)) |
| get_items | get_image_files                | -                                      |
| splitter  | RandomSplitter(valid_pct=0.2)  | RandomSplitter(valid_pct=0.2)          |
| get_x     | -                              | get_x                                  |
| get_y     | lambda x: str(parent_label(x)) | get_y                                  |
| item_tfms | Resize (512)                   | Resize (512)                           |

**ii). Batch Transforms**

| Transformation | Classification Task                                                                                                                                 | Regression Task                                                                                                                                     |
|----------------|-----------------------------------------------------------------------------------------------------------------------------------------------------|-----------------------------------------------------------------------------------------------------------------------------------------------------|
| aug_transforms | size=224, min_scale=0.75, max_lighting=0.05, do_flip=True, flip_vert=False, max_rotate=15, max_warp=0.0, p_affine=0.8, max_zoom=0.1, p_lighting=0.8 | size=224, min_scale=0.75, max_lighting=0.1, do_flip=True, flip_vert=False, max_rotate=15, max_warp=0.1, p_affine=0.8, max_zoom=0.15, p_lighting=0.8 |
| Resize         | 224, 224                                                                                                                                            | 224, 224                                                                                                                                            |
| Normalize      | Normalize.from_stats(*imagenet_stats)                                                                                                               | Normalize.from_stats(*imagenet_stats)                                                                                                               |

**Table S2:** *The conversion of regression points into classification metrics utilizing variable thresholds.*

| <b>Threshold Tolerance (+/-)</b> | <b>Accuracy (%)</b> |
|----------------------------------|---------------------|
| <b>0.05</b>                      | <b>54.06</b>        |
| <b>0.10</b>                      | <b>85.18</b>        |
| <b>0.15</b>                      | <b>96.89</b>        |
| <b>0.2</b>                       | <b>99.20</b>        |

**Table S3:** External validation on publicly available datasets for glaucoma screening at various cut-off thresholds for glaucoma.

| Dataset           | Number of Images (Healthy=H, Glaucoma=G) | Cut-off Threshold | Performance Metrics (%) |             |             | Predicted ungradable Images | Time Taken (seconds) |
|-------------------|------------------------------------------|-------------------|-------------------------|-------------|-------------|-----------------------------|----------------------|
|                   |                                          |                   | Accuracy                | Sensitivity | Specificity |                             |                      |
| <b>EyePACS</b>    | H=98,172, G=3270                         | 0.5               | 61.05                   | 93.28       | 60.00       | 955                         | 13251.07             |
| <b>Drishti-GS</b> | H=31, G=70                               | 0.5               | 84.16                   | 90.00       | 70.97       | 0                           | 35.63                |
| <b>EyePACS</b>    | H=98,172, G=3270                         | 0.6               | 82.49                   | 72.02       | 82.83       | 955                         | 26789.02             |
| <b>Drishti-GS</b> | H=31, G=70                               | 0.6               | 79.21                   | 78.87       | 80.65       | 0                           | 47.37                |
| <b>EyePACS</b>    | H=98,172, G=3270                         | 0.7               | 94.92                   | 30.64       | 97.01       | 955                         | 27177.49             |
| <b>Drishti-GS</b> | H=31, G=70                               | 0.7               | 64.36                   | 50.00       | 96.77       | 0                           | 35.46                |
